# Supplementary material
Source: PubMed Central journal article supplement (PMC10872947)
Supplement: NIHMS1950302-supplement-13.pdf [file NIHMS1950302-supplement-13.pdf]

## Supplementary Figure and Table Legends

### Supplementary Figure S1

**(A)** Transcript levels of *Raldh1* in human tumor formalin fixed paraffin embedded (FFPE) samples measured by RT-qPCR. *Raldh1* is higher in primary and metastatic HCC. HCC-M: Metastatic HCC; HCC-P: Primary HCC; GIST: Gastrointestinal Stromal Tumor; CrC: Colorectal Cancer; Lv: Normal Liver. One experiment with at least three replicates per sample type. One-way ANOVA. \* $p < 0.05$ , \*\* $p < 0.01$ , \*\*\* $p < 0.001$ .

**(B)** *Raldh2* (left plot) and *Raldh3* (right plot) transcript levels (Y-axis, RSEM, batch normalized) in different tumor types (X-axis) from the TCGA databased analyzed through the cBioPortal (<https://www.cbioportal.org>) web interface.

**(C)** Transcript levels of *Raldh1*, *Raldh2* and *Raldh3* in human HCC FFPE samples measured by RT-qPCR. *Raldh1* is the dominant isozyme in the majority of specimens. One experiment with at least three replicates per sample type. One-way ANOVA. \* $p < 0.05$ , \*\* $p < 0.01$ , \*\*\* $p < 0.001$ .

**(D)** De-identified human tumors (archived formalin fixed and paraffin embedded) were sectioned and stained with anti-RALDH1 antibody. Shown is the staining intensity (Y-axis) plotted against tumor type (X-axis). See also figure 1C. One experiment with at least three replicates per sample type. One-way ANOVA. \* $p < 0.05$ , \*\* $p < 0.01$ , \*\*\* $p < 0.001$ . Calculated significance is compared to normal liver.

**(E)** Published (Lu et. al., Nat. Comm., Aug, 2022, PMID: 35933472) human HCC dataset was analyzed for the expression of highlighted genes using a web interface (omic.tech/scrna-hcc) developed by the authors. *Raldh1* is the primary isozyme expressed and is restricted to non-leukocytes within the tumors. Ptprc: protein-tyrosine phosphatase (CD45), a pan-leukocyte marker. Raldh: Retinaldehyde dehydrogenase.

**(F)** Transcript levels of the three *Raldh* isozymes in mouse HCC cell line (Hepa 1-6) and normal mouse liver. HCC cells predominantly express *Raldh1* unlike normal liver where all three isozymes are detected.

### Supplementary Figure S2

**(A)** Transcript levels (RT-qPCR) of *Raldh1*, *Raldh2* and *Raldh3* in SNU398 cells treated with different concentrations of C86 or C91 for 24 hours.

**(B)** Homology modeling identifies differences in amino acid residues between human and murine RALDH1 at sites predicted to bind RALDH1-INH.

**(C)** SNU398 cells were treated with various concentrations of C86 or C91 for 24 hours. Cell viability was measured by flow cytometry (FCM) with 7-AAD staining (Y-axis indicates percentage of 7AAD negative cells).

### Supplementary Figure S3

**(A-B)** Total RNA was extracted from experiments described in Fig.3A and Fig.3B and the transcript levels of DC- (Zbtb46 and Irf4) and macrophage - (Mafb) associated genes were measured by RT-qPCR. Top row display results from human cells corresponding to experiment in Fig. 3A and the bottom row mouse cells corresponding to Fig. 3B. Zbtb46 expression marks all DCs while Irf4 expression is induced upon monocyte to DC differentiation. Mafb expression marks macrophage differentiation and its levels are low in DCs. Three or more independent experiments with at least three replicates per sample type. Two-tailed T test. \*p < 0.05, \*\*p < 0.01, \*\*\*p < 0.001.

### Supplementary Figure S4

**(A)** Tumors at the endpoint for experiment outlined in Figure 4A.

**(B)** FCM plots of Macrophages (F4/80<sup>+</sup> cells) in spleen tissues from experiment in Figure 4B, showing macrophage depletion with CloLipo.

**(C)** Different human HCC lines were cultured for three days with conditioned medium (CM) from wells containing macrophages treated with different compounds (X-axis, macrophage CM). HCC cells exposed to the same compounds without conditioned media (X-axis, control CM) served as additional control. Viable HCC cell numbers were counted after three days (Y-axis). Three or more independent experiments with at least three replicates per sample type. Two-tailed T test. \*p < 0.05, \*\*p < 0.01, \*\*\*p < 0.001.

### Supplementary Figure S5

**(A)** Huh1 tumor-bearing nude mice were treated with C86 (i.p, 10mg/kg) every day. Three or more independent experiments with at least three replicates per sample type. Two-tailed T test. \*p < 0.05, \*\*p < 0.01, \*\*\*p < 0.001.

**(B)** Equal numbers of *Raldh1*-KO Huh7 and parental Huh7 cells were seeded and viable cells counted over time. RALDH1 deficiency does not suppress cell proliferation in vitro.

**(C)** NU/J mice harboring flank Huh7 tumors were treated i.p with C86 daily or with liposomal chlodronate (CloLipo, 200µl/mouse) every four days. Tumors were harvested 13 days post tumor induction and analyzed for the frequency (left graph) and number (right graph) of the macrophages (CD45+ F4/80+) under different treatment conditions (X-axis). Three or more independent experiments with at least three replicates per sample type. Two-tailed T test. \*p < 0.05, \*\*p < 0.01, \*\*\*p < 0.001.

**(D)** Pictures depicting size differences amongst tumors in experiment outlined in Fig 5G.

**(E)** FCS-based analyses of macrophage percentage (F4/80+ cells) within leukocytes (CD45+ cells) in tumors described in Fig 5G. Two independent experiments were performed with at least three replicates per experimental group. Two-tailed T test. \*p < 0.05, \*\*p < 0.01, \*\*\*p < 0.001.

### Supplementary Figure S6

**(A)** IC50 of C-86 and C-99 on the different human RALDH isozymes.

**(B)** Cell viability was measured by flow cytometry (FCM) with 7-AAD in experiment outlined in Fig. 6B

**(C)** Tumors at endpoint from experiment in **Fig.6C**.

**(D)** Tumor weights at the endpoint for **Figure 6G**. One experiment with at least three replicates per experimental group. Two-tailed T test. \*p < 0.05, \*\*p < 0.01, \*\*\*p < 0.001.

**(E-F)** RALDH1 was deleted with CRISPR/Cas9 in murine Hep55 HCC cell line (E, Top panel). Two independent clones – 2 and 19 – were selected (E, Top panel). Both clones did not show any difference in growth *in vitro* when compared to parental WT cells (E, bottom panel). **(F)** In contrast to *in vitro* growth, both clones showed dramatic growth suppression *in vivo* in a syngeneic (C57BL/6) flank transplantation model. Picture shows tumor size at endpoint corresponding to experiment show in Figure 7A.

**(G)** Graph shows growth of tumors of the indicated genotypes and treatment syngeneically transplanted into C57BL/6 mice. Of note, there is a small but significant synergy between loss of RALDH1 and anti-PD1 treatment (green vs. yellow line). Clone 2 was used for RALDH1-KO Hep55 cell line. Three or more independent experiments were performed with at least three replicates per experimental group. One-way ANOVA. \*p < 0.05, \*\*p < 0.01, \*\*\*p < 0.001.

**(H)** Hep55 murine HCC cells were transplanted into the flanks of syngeneic C57BL/6 mice. Tumors were then harvested and single cell suspension were subjected to multi-parametric flow cytometry. Shown are the

sequential (arrow) gating scheme leading to two macrophage subsets based on CD163 – a marker for immunosuppressive macrophages. The histogram overlays on right (Red: Mac1 subset; Blue: Mac2 subset) show the expression of anti-inflammatory (CD206 and Folate receptor B) and pro-inflammatory (MHCII and CD11C) markers in Mac1 and Mac2 subsets, supporting their pro - and anti-inflammatory function respectively.

**(I)** Flow cytometry-based comparison of macrophages in WT and RALDH1-knockout Hep55 tumors show increased MHCII+ pro-inflammatory macrophages in KO. Three or more independent experiments were performed with at least three replicates per experimental group. Two-tailed T test. \* $p < 0.05$ , \*\* $p < 0.01$ , \*\*\* $p < 0.001$ .

### **Supplementary Figure S7**

**(A)** Completed blood count (CBC) was performed at IDEXX on whole blood collected from indicated RALDH1 genotypes (X-axis). One experiment with four replicates per experimental group. One-way ANOVA. \* $p < 0.05$ , \*\* $p < 0.01$ , \*\*\* $p < 0.001$ .

**(B)** Weights of mice of the indicated RALDH1 genotypes. Siblings were used for all genotypes to control for confounding factors. One experiment with four replicates per experimental group. One-way ANOVA. \* $p < 0.05$ , \*\* $p < 0.01$ , \*\*\* $p < 0.001$ .

**(C)** Pharmacokinetics of C86 delivered through an oral formulation with diet (chow). Diet (or PO) # A, B, and C (shown in the inbox of individual graphs) corresponds to drug dose of 10, 30, and 60 mg/kg respectively. Mice had free access to food and water during the 15-day study. Graph shows drug concentrations (Y-axis) is plotted against time (X-axis) in various tissue (header).

**(D)** Shows mouse weight (Y-axis) measured every day (X-axis) for the 15-day study described in (A).

### **Supplementary Table S1**

List of key reagents

### **Supplementary Table S2**

Table comparing various key pharmacokinetic parameters (Assay, left column) between C-91 and C-86.

### **Supplementary Table S3**

Safetyscreen assay for C86 performed at eurofins.

### **Supplementary Table S4**

Plasma pharmacokinetic comparisons of C86, C91, and C99 in mice for parameters outlined in the table.

### **Supplementary Table S5**

Tissue pharmacokinetics and bio-distribution of C86 at two different doses through the intraperitoneal route.
